# Supplementary material
Source: PubMed Central journal article supplement (PMC8940631)
Supplement: NIHMS1757869-supplement-1.pdf [file NIHMS1757869-supplement-1.pdf]

**Appendix**  
**Gestational Diabetes and Hypertensive Disorders of Pregnancy by Maternal Birthplace**  
**Shah et al.**

**Appendix Table 1.** Characteristics of Women With a First Live Singleton Birth in the U.S. by Maternal Race/Ethnicity and Place of Birth, 2014–2019

| Place of birth                                       | Non-Hispanic White   |                      | Non-Hispanic Black   |                      | Hispanic/Latina      |                      | Non-Hispanic Asian/PI |                      |
|------------------------------------------------------|----------------------|----------------------|----------------------|----------------------|----------------------|----------------------|-----------------------|----------------------|
|                                                      | U.S.                 | Outside U.S.         | U.S.                 | Outside U.S.         | U.S.                 | Outside U.S.         | U.S.                  | Outside U.S.         |
|                                                      | n (%)                 | n (%)                |
| N                                                    | 4,431,830            | 312,835              | 1,034,029            | 173,451              | 1,090,071            | 702,605              | 151,127               | 539,177              |
| Age, years, mean (SD)                                | 27.1 (5.6)           | 29.7 (5.4)           | 24.0 (5.4)           | 28.8 (5.5)           | 23.9 (5.4)           | 26.0 (6.0)           | 29.3 (5.6)            | 30.1 (4.7)           |
| Education                                            |                      |                      |                      |                      |                      |                      |                       |                      |
| Less than high school                                | 297,160<br>(6.7)     | 13,067<br>(4.2)      | 147,437<br>(14.4)    | 14,984<br>(8.7)      | 184,090<br>(17.0)    | 188,045<br>(27.2)    | 5,996<br>(4.0)        | 27,582<br>(5.2)      |
| High school graduate                                 | 918,577<br>(20.8)    | 43,463<br>(14.1)     | 360,602<br>(35.1)    | 40,016<br>(23.3)     | 357,106<br>(33.0)    | 222,661<br>(32.2)    | 18,191<br>(12.2)      | 56,917<br>(10.7)     |
| Any college                                          | 3,197,290<br>(72.5)  | 252,042<br>(81.7)    | 519,351<br>(50.6)    | 116,512<br>(67.9)    | 540,263<br>(50.0)    | 280,843<br>(40.6)    | 125,363<br>(83.8)     | 446,987<br>(84.1)    |
| Insurance                                            |                      |                      |                      |                      |                      |                      |                       |                      |
| Medicaid                                             | 1,176,449<br>(26.7)  | 83,313<br>(26.8)     | 650,344<br>(63.2)    | 82,105<br>(47.8)     | 600,573<br>(55.4)    | 389,795<br>(55.9)    | 29,828<br>(19.8)      | 118,667<br>(22.1)    |
| Private insurance                                    | 2,985,072<br>(67.8)  | 194,996<br>(62.8)    | 324,758<br>(31.6)    | 62,466<br>(36.4)     | 414,201<br>(38.2)    | 188,591<br>(27.0)    | 112,128<br>(74.5)     | 359,099<br>(66.9)    |
| Self-pay                                             | 79,737<br>(1.8)      | 20,932<br>(6.7)      | 15,119<br>(1.5)      | 19,220<br>(11.2)     | 19,620<br>(1.8)      | 85,294<br>(12.2)     | 1,827<br>(1.2)        | 41,970<br>(7.8)      |
| Other                                                | 161,147<br>(3.7)     | 11,394<br>(3.7)      | 38,051<br>(3.7)      | 7,928<br>(4.6)       | 50,215<br>(4.6)      | 33,880<br>(4.9)      | 6,730<br>(4.5)        | 16,755<br>(3.1)      |
| Receipt of prenatal care                             |                      |                      |                      |                      |                      |                      |                       |                      |
| Starting 1st trimester                               | 3,639,106<br>(84.0)  | 238,196<br>(78.7)    | 698,760<br>(70.5)    | 103,182<br>(62.3)    | 801,478<br>(75.4)    | 468,870<br>(69.0)    | 124,644<br>(84.4)     | 422,474<br>(80.3)    |
| Starting 2nd trimester                               | 532,677<br>(12.3)    | 41,357<br>(13.7)     | 217,008<br>(21.9)    | 36,111<br>(21.8)     | 193,847<br>(18.2)    | 141,432<br>(20.8)    | 17,359<br>(11.8)      | 71,543<br>(13.6)     |
| Starting 3rd trimester                               | 122,514<br>(2.8)     | 19,846<br>(6.6)      | 51,816<br>(5.2)      | 22,229<br>(13.4)     | 49,962<br>(4.7)      | 51,944<br>(7.6)      | 4,293<br>(2.9)        | 27,646<br>(5.3)      |
| No prenatal care                                     | 37,010<br>(0.9)      | 3,455<br>(1.1)       | 23,424<br>(2.4)      | 3,968<br>(2.4)       | 18,265<br>(1.7)      | 17,753<br>(2.6)      | 1,351<br>(0.9)        | 4,484<br>(0.9)       |
| Pre-pregnancy BMI (kg/m <sup>2</sup> ), median (IQR) | 24.6<br>(21.6, 29.3) | 22.9<br>(20.7, 26.0) | 26.4<br>(22.3, 32.1) | 24.9<br>(21.9, 28.7) | 25.6<br>(22.3, 30.5) | 24.5<br>(21.8, 28.2) | 23.4<br>(21.0, 27.3)  | 22.1<br>(20.0, 24.9) |
| Pre-pregnancy hypertension                           | 77,537<br>(1.7)      | 2,489<br>(0.8)       | 29,873<br>(2.9)      | 3,322<br>(1.9)       | 11,579<br>(1.1)      | 6,334<br>(0.9)       | 2,076<br>(1.4)        | 3,872<br>(0.7)       |
| Pre-pregnancy DM                                     | 32,263<br>(0.7)      | 1,378<br>(0.4)       | 11,054<br>(1.1)      | 1,350<br>(0.8)       | 8,453<br>(0.8)       | 4,925<br>(0.7)       | 1,245<br>(0.8)        | 3,936<br>(0.7)       |

DM, diabetes mellitus; PI, Pacific Islander.

**Appendix**  
**Gestational Diabetes and Hypertensive Disorders of Pregnancy by Maternal Birthplace**  
**Shah et al.**

**Appendix Table 2.** Characteristics of Hispanic/Latina Women With a First Live Singleton Birth in the U.S. by Maternal Place of Birth, 2014–2019

| Place of birth                                       | Mexican              |                      | Puerto Rican         |                      | Cuban                |                      | Central/South American |                      |
|------------------------------------------------------|----------------------|----------------------|----------------------|----------------------|----------------------|----------------------|------------------------|----------------------|
|                                                      | U.S.                 | Outside U.S.         | U.S.                 | Outside U.S.         | U.S.                 | Outside U.S.         | U.S.                   | Outside U.S.         |
|                                                      | n (%)                  | n (%)                |
| N                                                    | 657,738              | 328,659              | 114,300              | 35,088               | 25,938               | 34,856               | 68,673                 | 215,846              |
| Age, years, mean (SD)                                | 23.5 (5.3)           | 25.4 (5.9)           | 24.4 (5.5)           | 25.0 (5.9)           | 27.3 (5.6)           | 27.4 (5.2)           | 25.5 (5.8)             | 26.7 (6.3)           |
| Education                                            |                      |                      |                      |                      |                      |                      |                        |                      |
| Less than high school                                | 118,849<br>(18.2)    | 94,179<br>(29.1)     | 18,854<br>(16.6)     | 5,243<br>(15.0)      | 1,646<br>(6.4)       | 3,111<br>(9.0)       | 7,599<br>(11.1)        | 67,513<br>(31.9)     |
| High school graduate                                 | 225,819<br>(34.6)    | 119,821<br>(37.0)    | 36,684<br>(32.2)     | 11,242<br>(32.3)     | 5,225<br>(20.2)      | 14,961<br>(43.4)     | 16,365<br>(24.0)       | 51,704<br>(24.4)     |
| Any college                                          | 307,932<br>(47.2)    | 109,874<br>(33.9)    | 58,232<br>(51.2)     | 18,361<br>(52.7)     | 18,969<br>(73.4)     | 16,411<br>(47.6)     | 44,273<br>(64.9)       | 92,408<br>(43.7)     |
| Insurance                                            |                      |                      |                      |                      |                      |                      |                        |                      |
| Medicaid                                             | 371,407<br>(56.7)    | 188,648<br>(57.9)    | 60,703<br>(53.4)     | 20,460<br>(58.7)     | 8,076<br>(31.2)      | 21,748<br>(62.5)     | 29,998<br>(43.9)       | 107,661<br>(50.2)    |
| Private insurance                                    | 240,848<br>(36.8)    | 73,798<br>(22.6)     | 46,142<br>(40.6)     | 11,874<br>(34.0)     | 16,671<br>(64.5)     | 11,581<br>(33.3)     | 34,338<br>(50.2)       | 64,612<br>(30.1)     |
| Self-pay                                             | 13,605<br>(2.1)      | 47,028<br>(14.4)     | 1,459<br>(1.3)       | 487<br>(1.4)         | 273<br>(1.1)         | 764<br>(2.2)         | 1,187<br>(1.7)         | 30,469<br>(14.2)     |
| Other                                                | 29,067<br>(4.4)      | 16,566<br>(5.1)      | 5,273<br>(4.6)       | 2,061<br>(5.9)       | 842<br>(3.3)         | 678<br>(1.9)         | 2,874<br>(4.2)         | 11,593<br>(5.4)      |
| Receipt of prenatal care                             |                      |                      |                      |                      |                      |                      |                        |                      |
| Starting 1st trimester                               | 477,259<br>(74.2)    | 216,024<br>(67.5)    | 84,447<br>(76.5)     | 26,098<br>(77.7)     | 21,304<br>(85.1)     | 26,813<br>(80.5)     | 52,262<br>(78.2)       | 139,846<br>(67.2)    |
| Starting 2nd trimester                               | 121,348<br>(18.9)    | 68,703<br>(21.5)     | 19,894<br>(18.0)     | 5,593<br>(16.6)      | 2,898<br>(11.6)      | 5,112<br>(15.3)      | 11,055<br>(16.5)       | 44,827<br>(21.5)     |
| Starting 3rd trimester                               | 32,001<br>(5.0)      | 25,152<br>(7.9)      | 4,771<br>(4.3)       | 1,517<br>(4.5)       | 665<br>(2.7)         | 1,055<br>(3.2)       | 2,812<br>(4.2)         | 17,827<br>(8.6)      |
| No prenatal care                                     | 12,251<br>(1.9)      | 10,277<br>(3.2)      | 1,335<br>(1.2)       | 384<br>(1.1)         | 175<br>(0.7)         | 327<br>(1.0)         | 734<br>(1.1)           | 5,520<br>(2.7)       |
| Pre-pregnancy BMI (kg/m <sup>2</sup> ), median (IQR) | 25.7<br>(22.3, 30.6) | 24.7<br>(21.9, 28.6) | 25.5<br>(22.0, 30.6) | 25.1<br>(21.8, 30.0) | 25.0<br>(22.1, 29.6) | 23.8<br>(21.5, 26.9) | 25.6<br>(22.5, 30.2)   | 24.1<br>(21.6, 27.4) |
| Pre-pregnancy hypertension                           | 6,404<br>(1.0)       | 2,532<br>(0.8)       | 1,649<br>(1.4)       | 647<br>(1.8)         | 328<br>(1.3)         | 356<br>(1.0)         | 735<br>(1.1)           | 1,709<br>(0.8)       |
| Pre-pregnancy DM                                     | 5,022<br>(0.8)       | 2,707<br>(0.8)       | 1,095<br>(1.0)       | 426<br>(1.2)         | 166<br>(0.6)         | 199<br>(0.6)         | 464<br>(0.7)           | 1,040<br>(0.5)       |

DM, diabetes mellitus.

**Appendix**  
**Gestational Diabetes and Hypertensive Disorders of Pregnancy by Maternal Birthplace**  
**Shah et al.**

**Appendix Table 3.** Characteristics of Non-Hispanic Asian Women With a First Live Singleton Birth in the U.S. by Maternal Place of Birth, 2014–2019

| Place of birth                                       | Asian Indian      |                   | Chinese           |                   | Filipina          |                   | Japanese          |                   | Korean            |                   | Vietnamese        |                   |
|------------------------------------------------------|-------------------|-------------------|-------------------|-------------------|-------------------|-------------------|-------------------|-------------------|-------------------|-------------------|-------------------|-------------------|
|                                                      | U.S.              | Outside U.S.      |
|                                                      | n (%)             |
| N                                                    | 19,752            | 178,262           | 22,387            | 142,664           | 20,760            | 51,037            | 4,897             | 12,596            | 9,630             | 30,677            | 11,777            | 39,337            |
| Age, years, mean (SD)                                | 30.9 (4.7)        | 29.5 (3.9)        | 32.1 (4.1)        | 30.6 (4.4)        | 29.5 (5.4)        | 30.6 (5.3)        | 32.5 (4.8)        | 33.6 (4.6)        | 31.8 (4.3)        | 32.7 (4.2)        | 29.6 (5.0)        | 30.3 (4.9)        |
| Education                                            |                   |                   |                   |                   |                   |                   |                   |                   |                   |                   |                   |                   |
| Less than high school                                | 261 (1.3)         | 5,087 (2.9)       | 115 (0.5)         | 5,790 (4.1)       | 518 (2.5)         | 1,058 (2.1)       | 58 (1.2)          | 181 (1.5)         | 56 (0.6)          | 151 (0.5)         | 326 (2.8)         | 3,141 (8.2)       |
| High school graduate                                 | 881 (4.5)         | 10,970 (6.2)      | 560 (2.5)         | 11,844 (8.5)      | 1,942 (9.5)       | 5,471 (10.8)      | 201 (4.1)         | 985 (7.9)         | 360 (3.8)         | 1,295 (4.3)       | 1,192 (10.2)      | 9,090 (23.7)      |
| Any college                                          | 18,447 (94.2)     | 160,424 (90.9)    | 21,501 (97.0)     | 122,249 (87.4)    | 18,061 (88.0)     | 43,903 (87.1)     | 4,588 (94.7)      | 11,274 (90.6)     | 9,141 (95.6)      | 28,954 (95.2)     | 10,127 (87.0)     | 26,176 (68.2)     |
| Insurance                                            |                   |                   |                   |                   |                   |                   |                   |                   |                   |                   |                   |                   |
| Medicaid                                             | 2,275 (11.6)      | 26,991 (15.2)     | 1,370 (6.1)       | 28,753 (20.2)     | 2,924 (14.1)      | 9,557 (18.8)      | 312 (6.4)         | 1,086 (8.7)       | 779 (8.1)         | 4,146 (13.6)      | 2,512 (21.4)      | 13,239 (33.8)     |
| Private insurance                                    | 16,945 (86.1)     | 143,731 (81.0)    | 20,292 (90.9)     | 80,280 (56.5)     | 16,163 (78.1)     | 36,069 (71.0)     | 4,283 (87.6)      | 10,141 (81.0)     | 8,358 (87.0)      | 23,840 (78.1)     | 8,735 (74.4)      | 23,381 (59.7)     |
| Self-pay                                             | 188 (1.0)         | 3,694 (2.1)       | 194 (0.9)         | 30,512 (21.5)     | 253 (1.2)         | 1,314 (2.6)       | 38 (0.8)          | 385 (3.1)         | 125 (1.3)         | 1,178 (3.9)       | 125 (1.1)         | 1,303 (3.3)       |
| Other                                                | 280 (1.4)         | 3,013 (1.7)       | 463 (2.1)         | 2,602 (1.8)       | 1,346 (6.5)       | 3,857 (7.6)       | 254 (5.2)         | 909 (7.3)         | 343 (3.6)         | 1,351 (4.4)       | 367 (3.1)         | 1,230 (3.1)       |
| Receipt of prenatal care                             |                   |                   |                   |                   |                   |                   |                   |                   |                   |                   |                   |                   |
| Starting 1st trimester                               | 16,759 (87.2)     | 145,811 (83.7)    | 20,105 (91.2)     | 114,205 (81.6)    | 17,616 (86.6)     | 40,397 (81.2)     | 4,242 (88.9)      | 10,365 (84.1)     | 8,354 (88.9)      | 24,922 (83.4)     | 9,666 (83.9)      | 29,587 (77.3)     |
| Starting 2nd trimester                               | 1,740 (9.1)       | 20,372 (11.7)     | 1,518 (6.9)       | 15,352 (11.0)     | 2,107 (10.4)      | 7,030 (14.1)      | 416 (8.7)         | 1,344 (10.9)      | 790 (8.4)         | 3,299 (11.0)      | 1,412 (12.3)      | 6,484 (17.0)      |
| Starting 3rd trimester                               | 526 (2.7)         | 6,711 (3.9)       | 318 (1.4)         | 9,703 (6.9)       | 467 (2.3)         | 1,896 (3.8)       | 74 (1.6)          | 523 (4.2)         | 208 (2.2)         | 1,491 (5.0)       | 302 (2.6)         | 1,639 (4.3)       |
| No prenatal care                                     | 186 (1.0)         | 1,216 (0.7)       | 95 (0.4)          | 696 (0.5)         | 159 (0.8)         | 428 (0.9)         | 37 (0.8)          | 91 (0.7)          | 45 (0.5)          | 174 (0.6)         | 140 (1.2)         | 542 (1.4)         |
| Pre-pregnancy BMI (kg/m <sup>2</sup> ), median (IQR) | 23.0 (20.7, 26.6) | 23.4 (21.2, 26.3) | 22.1 (20.4, 24.8) | 20.8 (19.1, 22.9) | 24.4 (21.8, 28.3) | 22.8 (20.5, 25.7) | 22.9 (20.8, 25.9) | 20.7 (19.2, 22.7) | 22.1 (20.3, 24.7) | 21.5 (19.7, 23.8) | 22.7 (20.6, 25.7) | 20.7 (19.1, 22.8) |
| Pre-pregnancy hypertension                           | 204 (1.0)         | 1,148 (0.6)       | 243 (1.1)         | 512 (0.4)         | 477 (2.3)         | 944 (1.8)         | 87 (1.8)          | 56 (0.4)          | 94 (1.0)          | 274 (0.9)         | 109 (0.9)         | 159 (0.4)         |

**Appendix**  
**Gestational Diabetes and Hypertensive Disorders of Pregnancy by Maternal Birthplace**  
**Shah et al.**

|               |       |       |       |       |       |       |       |       |       |       |       |       |
|---------------|-------|-------|-------|-------|-------|-------|-------|-------|-------|-------|-------|-------|
| Pre-pregnancy | 163   | 1,585 | 128   | 559   | 225   | 520   | 45    | 34    | 63    | 210   | 62    | 318   |
| DM            | (0.8) | (0.9) | (0.6) | (0.4) | (1.1) | (1.0) | (0.9) | (0.3) | (0.7) | (0.7) | (0.5) | (0.8) |

DM, diabetes mellitus.

**Appendix**  
**Gestational Diabetes and Hypertensive Disorders of Pregnancy by Maternal Birthplace**  
**Shah et al.**

**Appendix Table 4.** Distribution of Gestational Diabetes and Gestational Hypertension by Maternal Place of Birth, 2014–2019

| Variable                                  | Without GDM<br>n (%) | With GDM<br>n (%) |
|-------------------------------------------|----------------------|-------------------|
| Overall (total N=8,574,264)               |                      |                   |
| Without HDP                               | 7,488,310 (87.3)     | 390,524 (4.6)     |
| With HDP                                  | 630,117 (7.4)        | 65,313 (0.8)      |
| Born in the U.S. (total N=6,827,198)      |                      |                   |
| Without HDP                               | 5,948,078 (87.1)     | 275,271 (4.0)     |
| With HDP                                  | 550,436 (8.1)        | 53,413 (0.8)      |
| Born outside the U.S. (total N=1,747,066) |                      |                   |
| Without HDP                               | 1,540,232 (88.2)     | 115,253 (6.6)     |
| With HDP                                  | 79,681 (4.6)         | 11,900 (0.7)      |

GDM, gestational diabetes mellitus; HDP, hypertensive disorders of pregnancy.

**Appendix**  
**Gestational Diabetes and Hypertensive Disorders of Pregnancy by Maternal Birthplace**  
**Shah et al.**

**Appendix Table 5.** Characteristics of Women With Gestational Diabetes and Hypertensive Disorders of Pregnancy With a First Live Singleton Birth in the U.S. by Maternal Place of Birth, 2014–2019

| Place of birth                                       | Gestational diabetes mellitus |                       | Hypertensive disorders of pregnancy |                       |
|------------------------------------------------------|-------------------------------|-----------------------|-------------------------------------|-----------------------|
|                                                      | U.S.<br>n (%)                 | Outside U.S.<br>n (%) | U.S.<br>n (%)                       | Outside U.S.<br>n (%) |
| N                                                    | 328,684                       | 127,153               | 603,849                             | 91,581                |
| Age, years, mean (SD)                                | 28.4 (5.8)                    | 30.5 (5.3)            | 26.5 (5.8)                          | 28.7 (6.1)            |
| Education                                            |                               |                       |                                     |                       |
| Less than high school                                | 19,682 (6.0)                  | 14,093 (11.3)         | 50,267 (8.4)                        | 13,656 (15.2)         |
| High school graduate                                 | 73,265 (22.5)                 | 22,453 (18.0)         | 150,835 (25.2)                      | 21,401 (23.8)         |
| Any college                                          | 232,949 (71.5)                | 88,081 (70.7)         | 398,223 (66.4)                      | 54,841 (61.0)         |
| Insurance                                            |                               |                       |                                     |                       |
| Medicaid                                             | 104,509 (32.0)                | 44,685 (35.3)         | 218,207 (36.3)                      | 39,457 (43.3)         |
| Private insurance                                    | 207,621 (63.5)                | 70,141 (55.5)         | 354,208 (59.0)                      | 40,800 (44.8)         |
| Self-pay                                             | 3,019 (0.9)                   | 7,167 (5.7)           | 6,762 (1.1)                         | 6,613 (7.3)           |
| Other                                                | 11,725 (3.6)                  | 4,472 (3.5)           | 21,624 (3.6)                        | 4,166 (4.6)           |
| Receipt of prenatal care                             |                               |                       |                                     |                       |
| Starting 1st trimester                               | 270,588 (83.9)                | 97,202 (78.3)         | 482,690 (81.8)                      | 65,424 (73.7)         |
| Starting 2nd trimester                               | 40,322 (12.5)                 | 18,950 (15.3)         | 82,237 (13.9)                       | 16,187 (18.2)         |
| Starting 3rd trimester                               | 9,937 (3.1)                   | 7,298 (5.9)           | 19,015 (3.2)                        | 5,751 (6.5)           |
| No prenatal care                                     | 1,524 (0.5)                   | 760 (0.6)             | 5,938 (1.0)                         | 1,376 (1.6)           |
| Pre-pregnancy BMI (kg/m <sup>2</sup> ), median (IQR) | 29.6<br>(24.4, 35.9)          | 25.1<br>(22.0, 29.2)  | 28.3<br>(23.8, 34.3)                | 25.7<br>(22.5, 30.2)  |

**Appendix**  
**Gestational Diabetes and Hypertensive Disorders of Pregnancy by Maternal Birthplace**  
**Shah et al.**

**Appendix Table 6.** Characteristics of Women With a First Live Singleton Birth in the U.S., 2014 and 2019

| <b>Place of birth</b>                                | <b>2014</b>        | <b>2019</b>        |
|------------------------------------------------------|--------------------|--------------------|
|                                                      | <b>N=1,453,349</b> | <b>N=1,395,829</b> |
| Age, years, mean (SD)                                | 26.1 (5.8)         | 27.0 (5.8)         |
| <b>Place of birth</b>                                |                    |                    |
| U.S.                                                 | 1,175,288 (81.1)   | 1,109,058 (79.6)   |
| Outside the U.S.                                     | 274,786 (18.9)     | 284,409 (20.4)     |
| <b>Race/Ethnicity</b>                                |                    |                    |
| Non-Hispanic White                                   | 825,157 (57.7)     | 755,848 (55.1)     |
| Non-Hispanic Black                                   | 202,928 (14.2)     | 199,064 (14.5)     |
| Non-Hispanic Asian/Pacific Islander                  | 111,000 (7.8)      | 114,138 (8.3)      |
| Asian Indian                                         | 28,732 (8.8)       | 33,030 (9.6)       |
| Chinese                                              | 28,325 (8.6)       | 26,771 (7.8)       |
| Filipina                                             | 12,261 (3.7)       | 11,514 (3.3)       |
| Japanese                                             | 3,148 (1.0)        | 2,525 (0.7)        |
| Korean                                               | 7,010 (2.1)        | 6,317 (1.8)        |
| Vietnamese                                           | 8,241 (2.5)        | 8,810 (2.6)        |
| Hispanic/Latina                                      | 291,123 (20.4)     | 303,338 (22.1)     |
| Mexican                                              | 169,069 (51.6)     | 162,937 (47.3)     |
| Puerto Rican                                         | 21,651 (6.6)       | 26,444 (7.7)       |
| Cuban                                                | 8,808 (2.7)        | 10,691 (3.1)       |
| Central/South American                               | 40,246 (12.3)      | 55,593 (16.1)      |
| <b>Education</b>                                     |                    |                    |
| Less than high school                                | 171,594 (11.9)     | 128,149 (9.3)      |
| High school graduate                                 | 346,442 (24.1)     | 339,067 (24.6)     |
| Any college                                          | 919,984 (64.0)     | 910,090 (66.1)     |
| <b>Insurance</b>                                     |                    |                    |
| Medicaid                                             | 565,024 (39.2)     | 500,860 (36.1)     |
| Private insurance                                    | 766,580 (53.2)     | 789,469 (56.9)     |
| Self-pay                                             | 48,162 (3.3)       | 46,074 (3.3)       |
| Other                                                | 60,706 (4.2)       | 50,231 (3.6)       |
| <b>Receipt of prenatal care</b>                      |                    |                    |
| Starting 1st trimester                               | 1,100,581 (78.6)   | 1,087,687 (79.6)   |
| Starting 2nd trimester                               | 224,833 (16.0)     | 199,249 (14.6)     |
| Starting 3rd trimester                               | 57,921 (4.1)       | 59,220 (4.3)       |
| No prenatal care                                     | 17,599 (1.3)       | 20,499 (1.5)       |
| Pre-pregnancy BMI (kg/m <sup>2</sup> ), median (IQR) | 24.2 (21.3, 28.7)  | 25.0 (21.9, 29.9)  |
| Pre-pregnancy hypertension                           | 20,103 (1.4)       | 27,107 (1.9)       |
| Pre-pregnancy DM                                     | 9,833 (0.7)        | 12,039 (0.9)       |

*Notes:* Data presented are N (%) unless otherwise specified.

DM, diabetes mellitus.

**Appendix**  
**Gestational Diabetes and Hypertensive Disorders of Pregnancy by Maternal Birthplace**  
**Shah et al.**

**Appendix Table 7.** Age-Standardized Rates of Gestational Diabetes Mellitus per 1,000 Live Births in Race/Ethnic Subgroups in the U.S. by Maternal Place of Birth, 2014 and 2019

| <b>Place of birth</b>                      | <b>2014</b>          | <b>2019</b>          |
|--------------------------------------------|----------------------|----------------------|
| <b>Overall</b>                             |                      |                      |
| Outside U.S.                               | 62.7 (61.8, 63.7)    | 76.9 (75.9, 77.9)    |
| U.S.                                       | 48.1 (47.6, 48.5)    | 59.2 (58.8, 59.7)    |
| <b>Non-Hispanic White</b>                  |                      |                      |
| Outside U.S.                               | 46.6 (44.7, 48.5)    | 56.9 (54.7, 59.2)    |
| U.S.                                       | 46.9 (46.3, 47.4)    | 57.9 (57.3, 58.5)    |
| <b>Non-Hispanic Black</b>                  |                      |                      |
| Outside U.S.                               | 51.8 (49.1, 54.6)    | 59.3 (56.6, 62.2)    |
| U.S.                                       | 50.3 (48.7, 51.8)    | 55.0 (53.6, 56.5)    |
| <b>Hispanic/Latina</b>                     |                      |                      |
| Outside U.S.                               | 56.2 (54.6, 57.8)    | 64.6 (63.1, 66.2)    |
| U.S.                                       | 53.8 (52.3, 55.4)    | 68.1 (66.6, 69.6)    |
| <b>Mexican</b>                             |                      |                      |
| Outside U.S.                               | 66.2 (63.7, 68.7)    | 75.9 (73.1, 78.8)    |
| U.S.                                       | 58.8 (56.6, 61.0)    | 71.9 (69.7, 74.0)    |
| <b>Puerto Rican</b>                        |                      |                      |
| Outside U.S.                               | 26.7 (10.6, 57.2)    | 77.4 (70.3, 85.2)    |
| U.S.                                       | 56.9 (52.8, 61.2)    | 75.2 (70.4, 80.2)    |
| <b>Cuban</b>                               |                      |                      |
| Outside U.S.                               | 47.1 (40.7, 54.2)    | 67.4 (61.0, 74.4)    |
| U.S.                                       | 32.8 (27.2, 39.2)    | 54.4 (47.7, 61.9)    |
| <b>C/S American</b>                        |                      |                      |
| Outside U.S.                               | 44.8 (42.3, 47.3)    | 52.4 (50.0, 54.8)    |
| U.S.                                       | 37.4 (33.0, 42.2)    | 50.8 (46.8, 54.9)    |
| <b>Non-Hispanic Asian/Pacific Islander</b> |                      |                      |
| Outside U.S.                               | 84.5 (82.4, 86.6)    | 109.2 (106.8, 111.7) |
| U.S.                                       | 63.3 (60.1, 66.6)    | 83.0 (79.5, 86.6)    |
| <b>Asian Indian</b>                        |                      |                      |
| Outside U.S.                               | 112.2 (107.1, 117.6) | 135.5 (129.9, 141.5) |
| U.S.                                       | 64.1 (53.3, 76.5)    | 88.8 (77.9, 101.2)   |
| <b>Chinese</b>                             |                      |                      |
| Outside U.S.                               | 68.6 (64.5, 73.2)    | 92.6 (85.7, 100.3)   |
| U.S.                                       | 58.1 (47.8, 70.4)    | 77.7 (64.5, 93.9)    |
| <b>Filipina</b>                            |                      |                      |
| Outside U.S.                               | 84.5 (78.3, 91.1)    | 108.5 (101.3, 116.2) |
| U.S.                                       | 72.8 (64.3, 82.2)    | 90.2 (80.1, 101.3)   |
| <b>Japanese</b>                            |                      |                      |
| Outside U.S.                               | 29.2 (19.2, 57.5)    | 43.2 (29.4, 146.9)   |
| U.S.                                       | 48.4 (33.9, 70.0)    | 74.9 (51.8, 114.1)   |
| <b>Korean</b>                              |                      |                      |
| Outside U.S.                               | 49.3 (40.9, 61.2)    | 78.9 (56.4, 109.3)   |
| U.S.                                       | 64.1 (48.0, 84.8)    | 66.4 (54.0, 84.5)    |
| <b>Vietnamese</b>                          |                      |                      |



**Appendix**  
**Gestational Diabetes and Hypertensive Disorders of Pregnancy by Maternal Birthplace**  
**Shah et al.**

|              |                    |                      |
|--------------|--------------------|----------------------|
| Outside U.S. | 93.1 (85.5, 101.5) | 119.2 (109.3, 130.2) |
| U.S.         | 67.7 (51.2, 88.9)  | 85.3 (73.5, 98.8)    |

*Notes:* Rates per 1,000 live births.

APC, annual percent change; C/S, Central/South.

**Appendix**  
**Gestational Diabetes and Hypertensive Disorders of Pregnancy by Maternal Birthplace**  
**Shah et al.**

**Appendix Table 8.** Age-Standardized Rates of Hypertensive Disorders of Pregnancy per 1,000 Live Births in Race/Ethnic Subgroups in the U.S. by Maternal Place of Birth, 2014–2019

| Place of birth                             | 2014              | 2019                 |
|--------------------------------------------|-------------------|----------------------|
| <b>Overall</b>                             |                   |                      |
| Outside U.S.                               | 40.7 (39.9, 41.4) | 65.0 (64.0, 65.9)    |
| U.S.                                       | 73.0 (72.5, 73.5) | 109.3 (108.6, 109.9) |
| <b>Non-Hispanic White</b>                  |                   |                      |
| Outside U.S.                               | 37.2 (35.5, 39.1) | 56.1 (53.8, 58.5)    |
| U.S.                                       | 74.3 (73.6, 74.9) | 111.9 (111.1, 112.6) |
| <b>Non-Hispanic Black</b>                  |                   |                      |
| Outside U.S.                               | 54.2 (51.4, 57.2) | 85.8 (82.3, 89.4)    |
| U.S.                                       | 85.4 (83.6, 87.2) | 124.6 (122.5, 126.6) |
| <b>Hispanic/Latina</b>                     |                   |                      |
| Outside U.S.                               | 47.8 (46.4, 49.2) | 75.0 (73.4, 76.7)    |
| U.S.                                       | 63.8 (62.2, 65.3) | 93.7 (92.0, 95.4)    |
| <b>Mexican</b>                             |                   |                      |
| Outside U.S.                               | 50.2 (48.2, 52.3) | 75.7 (73.0, 78.3)    |
| U.S.                                       | 66.4 (64.2, 68.7) | 94.8 (92.5, 97.1)    |
| <b>Puerto Rican</b>                        |                   |                      |
| Outside U.S.                               | 50.6 (25.8, 90.0) | 100.7 (92.8, 109.1)  |
| U.S.                                       | 56.7 (52.9, 60.8) | 97.3 (92.2, 102.6)   |
| <b>Cuban</b>                               |                   |                      |
| Outside U.S.                               | 51.4 (44.9, 58.6) | 82.4 (75.3, 90.0)    |
| U.S.                                       | 59.8 (52.3, 68.1) | 95.6 (86.5, 105.5)   |
| <b>C/S American</b>                        |                   |                      |
| Outside U.S.                               | 41.8 (39.5, 44.2) | 66.3 (63.7, 68.9)    |
| U.S.                                       | 53.7 (48.6, 59.2) | 77.1 (72.4, 82.0)    |
| <b>Non-Hispanic Asian/Pacific Islander</b> |                   |                      |
| Outside U.S.                               | 28.6 (27.2, 29.9) | 48.0 (46.1, 50.0)    |
| U.S.                                       | 45.2 (42.5, 48.0) | 74.4 (70.9, 78.1)    |
| <b>Asian Indian</b>                        |                   |                      |
| Outside U.S.                               | 32.2 (29.3, 35.4) | 52.9 (48.3, 58.0)    |
| U.S.                                       | 37.2 (29.7, 46.3) | 64.4 (54.0, 76.4)    |
| <b>Chinese</b>                             |                   |                      |
| Outside U.S.                               | 12.9 (11.3, 14.8) | 23.1 (20.6, 26.5)    |
| U.S.                                       | 29.5 (22.4, 38.8) | 49.9 (38.3, 64.7)    |
| <b>Filipina</b>                            |                   |                      |
| Outside U.S.                               | 53.3 (48.3, 58.7) | 89.7 (82.2, 97.7)    |
| U.S.                                       | 68.4 (60.1, 77.7) | 100.4 (89.2, 112.7)  |
| <b>Japanese</b>                            |                   |                      |
| Outside U.S.                               | 21.4 (9.9, 52.5)  | 31.0 (18.1, 138.1)   |
| U.S.                                       | 27.9 (18.5, 44.5) | 66.0 (28.4, 128.4)   |
| <b>Korean</b>                              |                   |                      |
| Outside U.S.                               | 37.2 (26.8, 51.8) | 35.0 (25.9, 51.8)    |
| U.S.                                       | 24.7 (14.1, 40.9) | 66.6 (43.5, 98.0)    |
| <b>Vietnamese</b>                          |                   |                      |

**Appendix**  
**Gestational Diabetes and Hypertensive Disorders of Pregnancy by Maternal Birthplace**  
**Shah et al.**

|              |                   |                   |
|--------------|-------------------|-------------------|
| Outside U.S. | 20.5 (17.2, 24.5) | 29.3 (25.1, 34.7) |
| U.S.         | 33.9 (25.7, 46.6) | 56.3 (45.5, 69.1) |

*Notes:* Rates per 1,000 live births.

APC, annual percent change; C/S, Central/South.
